# Supplementary material for: A high-resolution inventory of air pollutant emissions from crop residue burning in China
Source: Copernicus journal article supplement (doi:10.5194/acp-2017-1113), 2018-03-02
Supplement: Supplementary file 1 [file acp-2017-1113-supplement.pdf]

**Table S1. The straw-grain ratios of different crops in typical regions of China.**

| Regions                                                    | Rice | Wheat | Corn | Legume | Tuber crop | Oil Plant | Cotton | Sugarcane | Fiber crop | Others |
|------------------------------------------------------------|------|-------|------|--------|------------|-----------|--------|-----------|------------|--------|
| Northeast China <sup>a</sup>                               | 0.97 | 0.93  | 1.86 | 1.70   | 0.71       | 2.00      | 3.66   | 0.10      | 1.70       | 0.97   |
| North China <sup>b</sup>                                   | 0.93 | 1.34  | 1.73 | 1.57   | 1.00       | 2.00      | 3.99   | 0.10      | 1.70       | 0.85   |
| Northwest China <sup>c</sup>                               | 1.05 | 1.23  | 1.52 | 1.07   | 1.22       | 2.00      | 3.67   | 0.10      | 1.70       | 1.23   |
| the middle and lower reaches of Yangtze River <sup>d</sup> | 1.28 | 1.38  | 2.05 | 1.68   | 1.16       | 2.05      | 3.32   | 0.10      | 1.70       | 1.06   |
| Southwest China <sup>e</sup>                               | 1.00 | 1.31  | 1.29 | 1.05   | 0.60       | 2.00      | 3.66   | 0.10      | 1.70       | 1.31   |
| South China <sup>f</sup>                                   | 1.06 | 1.38  | 1.32 | 1.08   | 1.41       | 2.00      | 3.66   | 0.10      | 1.70       | 1.38   |

(a) Including provinces: Liaoning, Jilin, Heilongjiang.

(b) Including provinces: Beijing, Tianjin, Hebei, Shanxi, Neimenggu, Shandong, Henan.

(c) Including provinces: Shanxi, Gansu, Qinghai, Ningxia, Xinjiang.

5 (d) Including provinces: Shanghai, Jiangsu, Zhejiang, Anhui, Jiangxi, Hubei, Hunan.

(e) Including provinces: Chongqing, Sichuan, Guizhou, Yunnan, Xizang.

(f) Including provinces: Fujian, Guangdong, Guangxi, Hainan.

**Table S2. The proportion of crop residue to be burned in each province of China.**

| Province       | proportion (%) | Province | proportion (%) | Province  | proportion (%) |
|----------------|----------------|----------|----------------|-----------|----------------|
| Beijing        | 13             | Shanghai | 12             | Hubei     | 30             |
| Tianjin        | 30             | Jiangsu  | 19             | Hunan     | 35             |
| Hebei          | 19             | Zhejiang | 22             | Guangdong | 18             |
| Shanxi         | 22             | Anhui    | 42             | Guangxi   | 35             |
| Inner Mongolia | 27             | Fujian   | 17             | Hainan    | 56             |
| Liaoning       | 34             | Jiangxi  | 25             | Chongqing | 45             |
| Jilin          | 25             | Shandong | 21             | Sichuan   | 30             |
| Heilongjiang   | 25             | Henan    | 22             | Guizhou   | 43             |
| Yunnan         | 31             | Xizang   | 28             | Shaanxi   | 28             |
| Gansu          | 33             | Qinghai  | 28             | Ningxia   | 16             |
| Xinjiang       | 30             |          |                |           |                |

**Table S3. Emission factors (EFs) of air pollutants from crop residue burning. (Unit of EFs: g kg<sup>-1</sup>)**

| Pollutants        | Crops                                          | EFs reported in previous studies        | EFs used in this study      | Related references <sup>(a)</sup> |
|-------------------|------------------------------------------------|-----------------------------------------|-----------------------------|-----------------------------------|
| BC                | Rice                                           | 0.52, 0.85, 0.5, 0.58, 0.47             | 0.58                        | 3, 8, 12, 14, 24                  |
|                   | Wheat                                          | 0.52, 0.8, 0.9, 0.5                     | 0.68                        | 11, 12, 14, 24                    |
|                   | Corn                                           | 0.78, 0.96, 0.75, 0.72, 0.52            | 0.75                        | 3, 8, 12, 14, 24                  |
|                   | Cotton                                         | 0.82                                    | 0.82                        | 24                                |
|                   | Sugarcane                                      | 0.77, 0.69                              | 0.73                        | 8, 11                             |
|                   | Others                                         | 0.75, 0.69, 0.66, 0.59, 0.8, 0.43, 0.47 | 0.63                        | 1, 2, 3, 5, 6, 7, 12              |
| NO <sub>x</sub>   | Rice                                           | 3.52, 3.1, 1.42, 2.93, 3.83             | 2.96                        | 4, 10, 16, 21, 25                 |
|                   | Wheat                                          | 2.59, 3.3, 1.19, 3.18, 1.14             | 2.28                        | 4, 10, 16, 21, 23                 |
|                   | Corn                                           | 3.36, 4.3, 4.51, 1.27                   | 3.36                        | 4, 10, 21, 23                     |
|                   | Legume                                         | 1.12, 1.08, 2.47                        | 1.56                        | 10, 16, 25                        |
|                   | Cotton                                         | 2.68, 3.37                              | 3.03                        | 4, 10                             |
|                   | Others                                         | 3.11, 5.3, 3.8, 3.83, 2.55, 3.37, 2.5   | 3.49                        | 1, 6, 9, 15, 17, 18, 27           |
| CO                | Rice                                           | 72.4, 34.7, 82, 64.2, 53.2, 48.7        | 59.20                       | 4, 10, 16, 22, 25, 28             |
|                   | Wheat                                          | 65.5, 60, 61.1                          | 62.20                       | 4, 10, 23                         |
|                   | Corn                                           | 70.2, 53, 40.3                          | 54.50                       | 4, 10, 23                         |
|                   | Legume                                         | 33.5, 32.3                              | 32.90                       | 10, 16                            |
|                   | Cotton                                         | 111.8, 68.3                             | 90.05                       | 4, 10                             |
|                   | Sugarcane                                      | 40.8                                    | 40.08                       | 25                                |
| Others            | 102, 102.2, 56.5, 92, 80.99, 68.33, 86.3, 56.4 | 80.59                                   | 1, 6, 9, 15, 17, 18, 23, 27 |                                   |
| CO <sub>2</sub>   | Rice                                           | 1757.6, 1460, 1105.2, 1101              | 1355.95                     | 4, 10, 25, 28                     |
|                   | Wheat                                          | 1483.6, 1460, 1557.9, 1320              | 1455.38                     | 4, 10, 22, 23                     |
|                   | Corn                                           | 1350, 1261.5, 1160                      | 1257.17                     | 10, 22, 23                        |
|                   | Legume                                         | 1445                                    | 1445.00                     | 10                                |
|                   | Cotton                                         | 1453.4, 1445                            | 1449.20                     | 4, 10                             |
|                   | Sugarcane                                      | 1152.5                                  | 1152.50                     | 25                                |
| Others            | 1585, 1584.9, 1410, 1515, 1445.76, 1445, 1130  | 1445.09                                 | 1, 6, 9, 15, 17, 18, 23     |                                   |
| PM <sub>2.5</sub> | Rice                                           | 12.95, 13.1, 12.1                       | 12.72                       | 10, 21, 25                        |
|                   | Wheat                                          | 7.6, 6.2                                | 6.90                        | 10, 21                            |
|                   | Corn                                           | 11.7, 10.5                              | 11.10                       | 10, 21                            |
|                   | Legume                                         | 3.32, 3.28                              | 3.30                        | 10, 21                            |
|                   | Sugarcane                                      | 4.12                                    | 4.12                        | 25                                |
|                   | Others                                         | 6.26, 6.3, 9.65, 3.88, 5.4, 3.9         | 5.90                        | 1, 6, 9, 12, 13, 27               |
| PM <sub>10</sub>  | Rice                                           | 14                                      | 14.00                       | 25                                |
|                   | Wheat                                          | 7.73                                    | 7.73                        | 26                                |
|                   | Corn                                           | 11.95                                   | 11.95                       | 26                                |
|                   | Sugarcane                                      | 5.65, 6.93                              | 6.29                        | 25, 26                            |
|                   | Others                                         | 11.7, 10                                | 10.85                       | 9, 27                             |

|                 |           |                                      |       |                         |
|-----------------|-----------|--------------------------------------|-------|-------------------------|
| SO <sub>2</sub> | Rice      | 0.147, 0.9, 0.75                     | 0.60  | 4, 10, 21               |
|                 | Wheat     | 0.049, 0.85, 0.63, 0.03              | 0.39  | 4, 10, 21, 23           |
|                 | Corn      | 0.026, 0.44, 0.46, 0.015             | 0.24  | 4, 10, 21, 23           |
|                 | Legume    | 0.25                                 | 0.25  | 10                      |
|                 | Cotton    | 0.002, 0.56                          | 0.28  | 4, 10                   |
|                 | Others    | 0.4, 0.54, 0.48, 0.37, 0.56, 0.216   | 0.43  | 6, 9, 12, 17, 18, 23    |
| OC              | Rice      | 1.96, 3.3, 7.68, 1.07                | 3.50  | 4, 10, 21, 25           |
|                 | Wheat     | 3.83, 2.7, 2.93                      | 3.15  | 4, 10, 21               |
|                 | Corn      | 2.21, 3.9, 5.93, 2.79                | 3.71  | 4, 10, 21, 25           |
|                 | Legume    | 1.1, 1.17                            | 1.14  | 10, 25                  |
|                 | Cotton    | 1.83, 4.5                            | 3.17  | 4, 10                   |
|                 | Sugarcane | 1.25                                 | 1.25  | 25                      |
|                 | Others    | 2.3, 1.7, 3.3, 4.49, 2.6             | 4.80  | 1, 13, 15, 18, 20       |
| NH <sub>3</sub> | Rice      | 0.78, 0.39                           | 0.59  | 10, 21                  |
|                 | Wheat     | 0.37, 0.29                           | 0.33  | 10, 21                  |
|                 | Corn      | 0.68, 0.41                           | 0.55  | 10, 21                  |
|                 | Legume    | 0.53                                 | 0.53  | 10                      |
|                 | Cotton    | 0.78                                 | 0.78  | 10                      |
|                 | Others    | 2.17, 2.2, 0.52, 1.3, 0.78           | 1.39  | 1, 6, 9, 15, 18         |
| CH <sub>4</sub> | Rice      | 3.2, 5.39                            | 4.30  | 10, 28                  |
|                 | Wheat     | 3.4, 2.62                            | 3.01  | 10, 23                  |
|                 | Corn      | 4.4, 1.6                             | 3.00  | 10, 23                  |
|                 | Legume    | 3.9                                  | 3.90  | 10                      |
|                 | Cotton    | 3.5                                  | 3.50  | 10                      |
|                 | Others    | 5.82, 5.8, 3.5, 3.9, 3.89, 2.7, 4.56 | 4.31  | 1, 6, 9, 15, 17, 18, 23 |
| NMVOC           | Rice      | 6.05, 8.4, 9.39                      | 7.95  | 10, 25, 28              |
|                 | Wheat     | 7.5, 9.37, 3.5                       | 6.79  | 10, 18, 28              |
|                 | Corn      | 10, 7.34, 4.49, 2.93                 | 6.19  | 10, 18, 25, 28          |
|                 | Legume    | 8.64                                 | 8.64  | 10                      |
|                 | Cotton    | 8.17                                 | 8.17  | 10                      |
|                 | Others    | 10.56, 15.7, 8.17, 7.97              | 10.60 | 9, 15, 18, 19           |

(a) Listed in Supplementary References.

**Table S4. Typical harvest months in different regions of China.**

| Region                                        | Rice      | Wheat | Corn     | Legume | Tuber crop | Oil Plant | Cotton |
|-----------------------------------------------|-----------|-------|----------|--------|------------|-----------|--------|
| Northeast China                               | 9-10      | 7-8   | 9-10     | 9-10   | 6-8        | 7-8       | 9-11   |
| North China                                   | 9-10      | 6-7   | 9-10     | 9-11   | 6-7,10-11  | 6-7       | 10-11  |
| Northwest China                               | 8-10      | 6-8   | 9-11     | 9-10   | 6-7,10-11  | 6-7       | 9-10   |
| the middle and lower reaches of Yangtze River | 6-7,10    | 5-6   | 8-10     | 10-11  | 5-6,10-11  | 5-6       | 10-11  |
| Southwest China                               | 6-7,9-10  | 5     | 7-9      | 10-11  | 5-6,10-11  | 5-6       | 10-11  |
| South China                                   | 5-7,10-11 | 4-5   | 6-7,9-10 | 6,11   | 5-6,10-11  | 5-6       | 10-12  |

**Table S5. Pollutant emissions at prefectural city level in 2014. (Unit for emission estimate: Gg)**

| Cities       | BC   | OC   | PM <sub>2.5</sub> | PM <sub>10</sub> | SO <sub>2</sub> | NO <sub>X</sub> | NH <sub>3</sub> | CH <sub>4</sub> | NMVOC | CO     | CO <sub>2</sub> |
|--------------|------|------|-------------------|------------------|-----------------|-----------------|-----------------|-----------------|-------|--------|-----------------|
| Beijing      | 0.09 | 0.45 | 1.28              | 1.40             | 0.03            | 0.39            | 0.07            | 0.38            | 0.79  | 6.95   | 160.44          |
| Tianjin      | 0.53 | 2.57 | 7.22              | 7.78             | 0.21            | 2.21            | 0.37            | 2.22            | 4.74  | 42.94  | 967.81          |
| Shijiazhuang | 0.99 | 4.88 | 12.44             | 13.99            | 0.44            | 4.01            | 0.71            | 4.30            | 9.37  | 82.55  | 1881.48         |
| Chengde      | 0.23 | 1.20 | 3.33              | 3.80             | 0.09            | 1.05            | 0.21            | 1.04            | 2.19  | 18.37  | 412.34          |
| Zhangjiakou  | 0.26 | 1.43 | 3.51              | 4.25             | 0.11            | 1.21            | 0.27            | 1.24            | 2.71  | 22.28  | 484.42          |
| Qinhuangdao  | 0.17 | 0.93 | 2.42              | 2.85             | 0.07            | 0.80            | 0.17            | 0.81            | 1.75  | 14.40  | 317.60          |
| Tangshan     | 0.64 | 3.36 | 8.90              | 10.26            | 0.30            | 2.85            | 0.58            | 3.02            | 6.47  | 54.57  | 1209.25         |
| Langfang     | 0.37 | 1.81 | 5.06              | 5.58             | 0.14            | 1.57            | 0.28            | 1.56            | 3.33  | 29.38  | 663.92          |
| Baoding      | 1.15 | 5.74 | 14.65             | 16.58            | 0.50            | 4.76            | 0.87            | 5.03            | 10.94 | 95.80  | 2165.59         |
| Cangzhou     | 0.94 | 4.52 | 12.15             | 13.39            | 0.40            | 3.80            | 0.66            | 4.01            | 8.68  | 77.74  | 1746.81         |
| Hengshui     | 0.78 | 3.77 | 10.01             | 10.99            | 0.34            | 3.14            | 0.56            | 3.37            | 7.37  | 66.70  | 1473.38         |
| Xingtai      | 0.95 | 4.58 | 12.18             | 13.39            | 0.41            | 3.83            | 0.70            | 4.13            | 9.04  | 82.01  | 1797.52         |
| Handan       | 1.11 | 5.38 | 14.30             | 15.74            | 0.48            | 4.49            | 0.78            | 4.76            | 10.35 | 93.02  | 2085.84         |
| Datong       | 0.23 | 1.16 | 3.27              | 3.70             | 0.08            | 1.03            | 0.19            | 0.98            | 2.06  | 17.36  | 398.65          |
| Shuozhou     | 0.30 | 1.52 | 4.26              | 4.83             | 0.11            | 1.35            | 0.25            | 1.29            | 2.71  | 22.89  | 521.80          |
| Xinzhou      | 0.08 | 0.46 | 1.04              | 1.48             | 0.04            | 0.39            | 0.11            | 0.48            | 1.07  | 7.74   | 174.30          |
| Taiyuan      | 0.08 | 0.41 | 1.19              | 1.32             | 0.03            | 0.37            | 0.06            | 0.34            | 0.71  | 6.10   | 140.74          |
| Yangquan     | 0.07 | 0.36 | 1.08              | 1.17             | 0.02            | 0.33            | 0.06            | 0.30            | 0.62  | 5.36   | 123.42          |
| Jinzhong     | 0.41 | 2.04 | 6.00              | 6.59             | 0.14            | 1.83            | 0.31            | 1.71            | 3.56  | 30.76  | 714.05          |
| Lvliang      | 0.23 | 1.15 | 3.24              | 3.61             | 0.09            | 1.01            | 0.17            | 0.99            | 2.10  | 18.10  | 418.22          |
| Changzhi     | 0.39 | 1.95 | 5.80              | 6.31             | 0.13            | 1.76            | 0.30            | 1.61            | 3.32  | 28.88  | 665.78          |
| Linfen       | 0.62 | 2.99 | 8.13              | 8.98             | 0.25            | 2.54            | 0.42            | 2.60            | 5.55  | 48.86  | 1132.51         |
| Jincheng     | 0.17 | 0.85 | 2.38              | 2.65             | 0.07            | 0.74            | 0.13            | 0.73            | 1.54  | 13.28  | 306.68          |
| Yuncheng     | 0.71 | 3.40 | 9.09              | 10.05            | 0.30            | 2.85            | 0.47            | 3.00            | 6.46  | 57.34  | 1320.99         |
| Chifeng      | 1.42 | 7.21 | 20.29             | 22.71            | 0.49            | 6.41            | 1.17            | 6.00            | 12.65 | 108.31 | 2461.88         |
| Ulanqab      | 0.26 | 1.57 | 3.05              | 4.18             | 0.13            | 1.25            | 0.36            | 1.38            | 3.19  | 25.44  | 516.55          |
| Ordos        | 0.48 | 2.50 | 6.80              | 7.71             | 0.17            | 2.20            | 0.42            | 2.07            | 4.42  | 37.78  | 842.53          |
| Bayan Nur    | 0.85 | 4.76 | 11.17             | 13.55            | 0.37            | 3.97            | 0.92            | 4.04            | 8.96  | 74.87  | 1592.73         |
| Wuhai        | 0.01 | 0.06 | 0.18              | 0.20             | 0.00            | 0.06            | 0.01            | 0.05            | 0.11  | 0.98   | 22.25           |
| Hohehot      | 0.40 | 2.09 | 5.46              | 6.32             | 0.15            | 1.81            | 0.37            | 1.76            | 3.79  | 32.05  | 709.61          |
| Baotou       | 0.33 | 1.75 | 4.67              | 5.31             | 0.12            | 1.52            | 0.30            | 1.45            | 3.12  | 26.72  | 591.35          |
| Tongliao     | 1.97 | 9.81 | 28.82             | 31.52            | 0.65            | 8.84            | 1.50            | 8.05            | 16.73 | 145.23 | 3346.40         |
| Hulun Buir   | 1.63 | 7.51 | 19.48             | 25.48            | 0.66            | 6.63            | 1.40            | 7.68            | 16.72 | 125.35 | 3106.89         |
| Shenyang     | 1.31 | 6.78 | 20.16             | 22.30            | 0.56            | 6.01            | 1.09            | 5.99            | 12.25 | 103.00 | 2344.40         |
| Dalian       | 0.41 | 2.03 | 6.02              | 6.77             | 0.16            | 1.82            | 0.33            | 1.80            | 3.72  | 30.89  | 720.19          |
| Anshan       | 0.44 | 2.23 | 6.77              | 7.40             | 0.18            | 2.00            | 0.35            | 1.94            | 3.95  | 33.62  | 773.65          |
| Fushun       | 0.19 | 0.95 | 2.87              | 3.15             | 0.08            | 0.85            | 0.15            | 0.83            | 1.70  | 14.33  | 330.20          |
| Benxi        | 0.09 | 0.43 | 1.31              | 1.44             | 0.03            | 0.39            | 0.07            | 0.38            | 0.78  | 6.55   | 151.30          |

|              |      |       |       |       |      |       |      |       |       |        |         |
|--------------|------|-------|-------|-------|------|-------|------|-------|-------|--------|---------|
| Dandong      | 0.33 | 1.72  | 5.30  | 5.83  | 0.16 | 1.53  | 0.27 | 1.58  | 3.17  | 26.35  | 605.84  |
| Jinzhou      | 0.76 | 3.89  | 11.41 | 12.56 | 0.29 | 3.47  | 0.62 | 3.30  | 6.82  | 58.30  | 1328.88 |
| Yingkou      | 0.18 | 0.95  | 3.10  | 3.40  | 0.11 | 0.83  | 0.15 | 0.96  | 1.86  | 14.94  | 344.13  |
| Fuxin        | 0.86 | 4.52  | 12.28 | 14.01 | 0.32 | 3.97  | 0.78 | 3.80  | 8.08  | 68.38  | 1521.97 |
| Liaoyang     | 0.29 | 1.51  | 4.74  | 5.17  | 0.14 | 1.35  | 0.24 | 1.40  | 2.79  | 23.19  | 533.02  |
| Panjin       | 0.23 | 1.31  | 4.57  | 5.06  | 0.19 | 1.13  | 0.22 | 1.51  | 2.85  | 21.62  | 501.67  |
| Tieling      | 1.34 | 6.80  | 19.97 | 22.05 | 0.50 | 6.07  | 1.08 | 5.79  | 11.98 | 102.06 | 2335.22 |
| Chaoyang     | 0.71 | 3.53  | 10.56 | 11.46 | 0.25 | 3.18  | 0.54 | 2.95  | 6.07  | 52.53  | 1208.17 |
| Huludao      | 0.17 | 0.87  | 2.45  | 2.76  | 0.06 | 0.77  | 0.15 | 0.74  | 1.56  | 13.16  | 296.94  |
| Changchun    | 2.83 | 14.37 | 42.49 | 46.58 | 1.05 | 12.86 | 2.25 | 12.15 | 25.05 | 214.97 | 4914.09 |
| Jilin        | 1.00 | 4.99  | 15.26 | 16.93 | 0.41 | 4.49  | 0.78 | 4.50  | 9.15  | 75.86  | 1777.77 |
| Siping       | 2.38 | 11.85 | 35.56 | 38.50 | 0.82 | 10.70 | 1.78 | 9.81  | 20.17 | 175.48 | 4046.52 |
| Liaoyuan     | 3.79 | 19.26 | 57.33 | 63.31 | 1.49 | 17.21 | 3.05 | 16.72 | 34.34 | 290.44 | 6674.57 |
| Tonghua      | 0.13 | 0.65  | 2.03  | 2.22  | 0.06 | 0.58  | 0.10 | 0.60  | 1.20  | 9.91   | 229.64  |
| Baishan      | 0.61 | 3.10  | 9.24  | 10.20 | 0.24 | 2.77  | 0.49 | 2.69  | 5.53  | 46.79  | 1075.32 |
| Baicheng     | 0.78 | 3.96  | 11.78 | 13.01 | 0.31 | 3.54  | 0.63 | 3.44  | 7.06  | 59.70  | 1371.94 |
| Songyuan     | 1.79 | 9.09  | 27.07 | 29.89 | 0.70 | 8.13  | 1.44 | 7.90  | 16.22 | 137.15 | 3151.81 |
| Harbin       | 3.63 | 18.35 | 56.73 | 62.39 | 1.56 | 16.46 | 2.85 | 16.59 | 33.50 | 279.18 | 6499.41 |
| Qiqihar      | 3.17 | 15.11 | 45.39 | 52.42 | 1.19 | 13.79 | 2.46 | 14.03 | 29.01 | 232.26 | 5627.97 |
| Mudanjiang   | 0.79 | 3.76  | 11.06 | 13.07 | 0.29 | 3.43  | 0.63 | 3.55  | 7.40  | 58.23  | 1419.48 |
| Jiamusi      | 1.50 | 7.69  | 24.48 | 27.65 | 0.80 | 6.86  | 1.26 | 7.72  | 15.36 | 121.17 | 2868.18 |
| Daqing       | 1.53 | 7.68  | 23.22 | 25.26 | 0.56 | 6.92  | 1.17 | 6.52  | 13.33 | 114.58 | 2648.69 |
| Jixi         | 0.74 | 3.70  | 11.61 | 12.97 | 0.34 | 3.33  | 0.59 | 3.52  | 7.06  | 57.22  | 1351.39 |
| Shuangyashan | 0.78 | 3.85  | 11.74 | 12.93 | 0.30 | 3.48  | 0.59 | 3.37  | 6.89  | 58.01  | 1358.35 |
| Yichun       | 0.17 | 0.71  | 2.26  | 3.08  | 0.08 | 0.68  | 0.14 | 0.92  | 1.90  | 12.34  | 343.11  |
| Qitaihe      | 0.26 | 1.29  | 3.88  | 4.31  | 0.09 | 1.17  | 0.20 | 1.12  | 2.30  | 19.37  | 456.15  |
| Hegang       | 0.19 | 1.00  | 3.30  | 3.70  | 0.12 | 0.88  | 0.16 | 1.06  | 2.06  | 16.01  | 377.32  |
| Heihe        | 0.82 | 3.00  | 8.67  | 13.42 | 0.32 | 2.94  | 0.64 | 4.16  | 8.95  | 54.83  | 1638.93 |
| Suihua       | 3.75 | 18.49 | 56.10 | 62.03 | 1.40 | 16.73 | 2.86 | 16.19 | 33.14 | 278.42 | 6537.48 |
| Shanghai     | 0.09 | 0.56  | 2.01  | 2.22  | 0.09 | 0.47  | 0.10 | 0.68  | 1.27  | 9.51   | 216.33  |
| Nanjing      | 0.19 | 1.10  | 3.17  | 3.71  | 0.15 | 0.89  | 0.20 | 1.21  | 2.45  | 19.09  | 421.89  |
| Wuxi         | 0.11 | 0.59  | 1.81  | 2.04  | 0.09 | 0.48  | 0.09 | 0.67  | 1.34  | 10.64  | 246.03  |
| Xuzhou       | 0.80 | 4.09  | 11.56 | 13.01 | 0.49 | 3.35  | 0.61 | 4.13  | 8.58  | 71.74  | 1646.50 |
| Changzhou    | 0.22 | 1.20  | 3.53  | 4.01  | 0.17 | 0.97  | 0.19 | 1.30  | 2.63  | 21.14  | 484.88  |
| Suzhou       | 0.32 | 1.70  | 5.12  | 5.76  | 0.24 | 1.38  | 0.26 | 1.86  | 3.74  | 30.08  | 695.10  |
| Nantong      | 0.60 | 3.25  | 8.78  | 10.50 | 0.42 | 2.63  | 0.59 | 3.48  | 7.27  | 57.70  | 1288.12 |
| Lianyungang  | 0.56 | 3.03  | 8.73  | 9.89  | 0.42 | 2.44  | 0.47 | 3.24  | 6.59  | 53.61  | 1222.58 |
| Huaian       | 0.70 | 3.77  | 11.12 | 12.57 | 0.54 | 3.03  | 0.58 | 4.14  | 8.35  | 67.22  | 1544.96 |
| Yancheng     | 1.15 | 6.16  | 17.77 | 20.15 | 0.82 | 4.99  | 0.98 | 6.54  | 13.37 | 109.14 | 2467.77 |
| Yangzhou     | 0.46 | 2.48  | 7.45  | 8.48  | 0.37 | 1.99  | 0.39 | 2.81  | 5.63  | 44.62  | 1029.08 |
| Zhenjiang    | 0.19 | 1.06  | 3.17  | 3.62  | 0.16 | 0.86  | 0.18 | 1.19  | 2.38  | 18.78  | 425.86  |

|            |      |       |       |       |      |      |      |       |       |        |         |
|------------|------|-------|-------|-------|------|------|------|-------|-------|--------|---------|
| Taizhou    | 0.50 | 2.71  | 7.90  | 9.04  | 0.39 | 2.17 | 0.43 | 3.01  | 6.08  | 48.59  | 1108.16 |
| Suqian     | 0.39 | 2.09  | 6.23  | 7.04  | 0.29 | 1.70 | 0.32 | 2.28  | 4.60  | 36.95  | 850.54  |
| Hangzhou   | 0.11 | 0.66  | 1.94  | 2.45  | 0.10 | 0.55 | 0.14 | 0.80  | 1.61  | 11.43  | 261.17  |
| Ningbo     | 0.13 | 0.69  | 2.32  | 2.76  | 0.11 | 0.59 | 0.13 | 0.88  | 1.71  | 12.28  | 290.64  |
| Jiaxing    | 0.20 | 1.18  | 3.99  | 4.50  | 0.19 | 0.98 | 0.21 | 1.41  | 2.69  | 20.13  | 456.85  |
| Huzhou     | 0.11 | 0.68  | 2.34  | 2.63  | 0.11 | 0.57 | 0.12 | 0.82  | 1.54  | 11.50  | 258.83  |
| Shaoxing   | 0.18 | 1.03  | 3.34  | 3.89  | 0.16 | 0.87 | 0.19 | 1.22  | 2.38  | 17.64  | 404.13  |
| Zhoushan   | 0.01 | 0.04  | 0.10  | 0.13  | 0.00 | 0.03 | 0.01 | 0.04  | 0.08  | 0.63   | 14.16   |
| Wenzhou    | 0.12 | 0.70  | 2.33  | 2.65  | 0.11 | 0.59 | 0.13 | 0.83  | 1.59  | 11.84  | 266.29  |
| Jinhua     | 0.13 | 0.72  | 2.23  | 2.65  | 0.10 | 0.62 | 0.15 | 0.85  | 1.69  | 12.50  | 281.38  |
| Quzhou     | 0.14 | 0.82  | 2.48  | 2.96  | 0.12 | 0.68 | 0.16 | 0.94  | 1.87  | 13.88  | 309.40  |
| Taizhou    | 0.11 | 0.62  | 1.98  | 2.33  | 0.10 | 0.53 | 0.12 | 0.74  | 1.46  | 10.63  | 243.12  |
| Lishui     | 0.08 | 0.48  | 1.43  | 1.79  | 0.07 | 0.40 | 0.10 | 0.58  | 1.17  | 8.31   | 189.20  |
| Hefei      | 1.13 | 6.66  | 19.83 | 23.06 | 0.97 | 5.43 | 1.24 | 7.48  | 14.97 | 115.96 | 2545.46 |
| Huaibei    | 0.50 | 2.27  | 5.54  | 6.56  | 0.25 | 1.81 | 0.30 | 2.24  | 4.95  | 42.11  | 1018.47 |
| Bozhou     | 1.89 | 8.75  | 21.37 | 25.18 | 0.92 | 7.01 | 1.20 | 8.45  | 18.66 | 159.61 | 3790.92 |
| Suzhou     | 1.81 | 8.84  | 21.33 | 25.38 | 0.87 | 7.15 | 1.37 | 8.31  | 18.38 | 156.09 | 3595.18 |
| Bengbu     | 1.23 | 6.60  | 15.84 | 19.06 | 0.76 | 5.18 | 1.13 | 6.49  | 14.12 | 117.09 | 2590.38 |
| Fuyang     | 2.27 | 10.82 | 27.50 | 31.87 | 1.15 | 8.75 | 1.52 | 10.43 | 22.66 | 193.28 | 4553.06 |
| Huainan    | 0.45 | 2.39  | 6.95  | 7.85  | 0.35 | 1.89 | 0.35 | 2.64  | 5.37  | 43.54  | 1009.24 |
| Chuzhou    | 1.49 | 8.20  | 23.58 | 27.06 | 1.15 | 6.58 | 1.34 | 8.94  | 18.17 | 145.47 | 3294.62 |
| Luan       | 1.55 | 8.70  | 26.38 | 30.03 | 1.28 | 7.05 | 1.45 | 9.76  | 19.45 | 153.26 | 3467.41 |
| Maanshan   | 0.38 | 2.20  | 6.50  | 7.53  | 0.32 | 1.78 | 0.40 | 2.46  | 4.94  | 38.60  | 852.21  |
| Wuhu       | 0.53 | 3.07  | 9.37  | 10.82 | 0.44 | 2.54 | 0.59 | 3.49  | 6.99  | 54.58  | 1174.71 |
| Xuancheng  | 0.47 | 2.76  | 8.13  | 9.50  | 0.40 | 2.25 | 0.51 | 3.09  | 6.20  | 47.97  | 1059.59 |
| Tongling   | 0.06 | 0.37  | 1.07  | 1.25  | 0.05 | 0.30 | 0.07 | 0.40  | 0.82  | 6.41   | 139.27  |
| Chizhou    | 0.28 | 1.68  | 5.08  | 5.89  | 0.24 | 1.39 | 0.34 | 1.89  | 3.81  | 29.84  | 629.63  |
| Anqing     | 1.00 | 5.92  | 18.19 | 21.05 | 0.86 | 4.91 | 1.17 | 6.77  | 13.54 | 105.26 | 2249.53 |
| Huangshan  | 0.13 | 0.77  | 2.21  | 2.70  | 0.11 | 0.64 | 0.16 | 0.87  | 1.75  | 13.03  | 286.55  |
| Ningde     | 0.07 | 0.45  | 1.23  | 1.52  | 0.06 | 0.36 | 0.10 | 0.50  | 1.02  | 7.56   | 161.47  |
| Putian     | 0.04 | 0.23  | 0.67  | 0.82  | 0.03 | 0.19 | 0.05 | 0.27  | 0.54  | 3.98   | 85.98   |
| Fuzhou     | 0.14 | 0.89  | 2.54  | 3.10  | 0.13 | 0.72 | 0.19 | 1.01  | 2.03  | 15.05  | 325.51  |
| Xiamen     | 0.01 | 0.04  | 0.08  | 0.12  | 0.00 | 0.03 | 0.01 | 0.04  | 0.10  | 0.72   | 13.95   |
| Nanping    | 0.07 | 0.46  | 1.33  | 1.62  | 0.07 | 0.38 | 0.10 | 0.53  | 1.06  | 7.88   | 170.32  |
| Zhangzhou  | 0.08 | 0.52  | 1.33  | 1.69  | 0.07 | 0.42 | 0.12 | 0.57  | 1.20  | 8.82   | 186.39  |
| Sanming    | 0.08 | 0.52  | 1.50  | 1.82  | 0.08 | 0.42 | 0.11 | 0.60  | 1.20  | 8.86   | 191.64  |
| Longyan    | 0.07 | 0.42  | 1.19  | 1.45  | 0.06 | 0.34 | 0.09 | 0.47  | 0.95  | 7.07   | 152.82  |
| Quanzhou   | 0.06 | 0.37  | 1.05  | 1.28  | 0.05 | 0.30 | 0.08 | 0.42  | 0.84  | 6.24   | 134.90  |
| Nanchang   | 0.48 | 2.95  | 9.58  | 11.02 | 0.47 | 2.45 | 0.56 | 3.49  | 6.73  | 50.09  | 1110.63 |
| Jingdezhen | 0.01 | 0.09  | 0.12  | 0.20  | 0.01 | 0.06 | 0.02 | 0.08  | 0.19  | 1.50   | 26.70   |
| Yingtian   | 0.01 | 0.05  | 0.07  | 0.12  | 0.00 | 0.04 | 0.02 | 0.05  | 0.12  | 0.90   | 16.08   |



|              |      |      |       |       |      |      |      |      |       |        |         |
|--------------|------|------|-------|-------|------|------|------|------|-------|--------|---------|
| Xinyu        | 0.05 | 0.32 | 1.03  | 1.19  | 0.05 | 0.27 | 0.06 | 0.38 | 0.74  | 5.67   | 122.62  |
| Ganzhou      | 0.51 | 3.10 | 10.48 | 11.93 | 0.50 | 2.59 | 0.57 | 3.73 | 7.10  | 52.55  | 1187.76 |
| Jiujiang     | 0.41 | 2.44 | 7.19  | 8.45  | 0.34 | 2.02 | 0.51 | 2.74 | 5.59  | 43.85  | 911.74  |
| Fuzhou       | 0.51 | 3.09 | 10.55 | 11.97 | 0.51 | 2.60 | 0.56 | 3.75 | 7.12  | 52.57  | 1191.71 |
| Shangrao     | 0.65 | 3.96 | 13.11 | 15.01 | 0.64 | 3.31 | 0.74 | 4.74 | 9.08  | 67.42  | 1508.22 |
| Pingxiang    | 0.11 | 0.68 | 2.17  | 2.53  | 0.11 | 0.57 | 0.13 | 0.80 | 1.56  | 11.58  | 258.21  |
| Ji'an        | 0.75 | 4.55 | 15.15 | 17.34 | 0.73 | 3.80 | 0.85 | 5.45 | 10.43 | 77.24  | 1735.41 |
| Yichun       | 0.07 | 0.51 | 0.73  | 1.20  | 0.05 | 0.38 | 0.15 | 0.46 | 1.14  | 9.02   | 159.50  |
| Jinan        | 0.58 | 2.84 | 7.49  | 8.31  | 0.25 | 2.37 | 0.40 | 2.49 | 5.38  | 47.76  | 1092.38 |
| Qingdao      | 0.77 | 3.99 | 9.67  | 11.25 | 0.35 | 3.27 | 0.65 | 3.49 | 7.69  | 66.51  | 1479.70 |
| Zibo         | 0.33 | 1.60 | 4.25  | 4.68  | 0.14 | 1.34 | 0.22 | 1.39 | 2.99  | 26.61  | 612.07  |
| Zaozhuang    | 0.37 | 1.85 | 4.60  | 5.28  | 0.17 | 1.51 | 0.28 | 1.65 | 3.61  | 31.41  | 712.14  |
| Dongying     | 0.26 | 1.21 | 3.55  | 3.73  | 0.11 | 1.05 | 0.19 | 1.13 | 2.46  | 23.31  | 485.36  |
| Yantai       | 0.54 | 2.92 | 6.66  | 8.13  | 0.25 | 2.38 | 0.54 | 2.56 | 5.72  | 48.10  | 1040.79 |
| Weifang      | 1.05 | 5.17 | 13.41 | 14.97 | 0.45 | 4.30 | 0.76 | 4.51 | 9.81  | 86.85  | 1964.81 |
| Jining       | 1.01 | 4.95 | 13.02 | 14.53 | 0.46 | 4.10 | 0.75 | 4.49 | 9.76  | 86.51  | 1930.85 |
| Taian        | 0.65 | 3.28 | 8.17  | 9.37  | 0.29 | 2.70 | 0.51 | 2.87 | 6.30  | 54.85  | 1232.35 |
| Weihai       | 0.24 | 1.34 | 2.92  | 3.66  | 0.12 | 1.08 | 0.26 | 1.18 | 2.66  | 22.10  | 472.58  |
| Rizhao       | 0.25 | 1.41 | 3.05  | 3.81  | 0.13 | 1.12 | 0.27 | 1.26 | 2.83  | 23.68  | 505.75  |
| Laiwu        | 0.06 | 0.31 | 0.81  | 0.93  | 0.02 | 0.27 | 0.05 | 0.26 | 0.57  | 4.92   | 108.23  |
| Linyi        | 1.02 | 5.59 | 12.50 | 15.43 | 0.52 | 4.47 | 1.03 | 5.07 | 11.33 | 94.79  | 2047.66 |
| Dezhou       | 1.41 | 6.73 | 18.08 | 19.66 | 0.60 | 5.62 | 0.91 | 5.91 | 12.76 | 115.34 | 2635.59 |
| Liaocheng    | 1.11 | 5.38 | 14.20 | 15.64 | 0.48 | 4.48 | 0.75 | 4.72 | 10.21 | 91.36  | 2086.69 |
| Binzhou      | 0.71 | 3.38 | 9.33  | 10.05 | 0.30 | 2.86 | 0.48 | 3.00 | 6.49  | 59.36  | 1322.43 |
| Heze         | 1.40 | 6.75 | 17.33 | 19.29 | 0.63 | 5.53 | 0.99 | 6.11 | 13.45 | 120.89 | 2691.99 |
| Zhengzhou    | 0.38 | 1.97 | 4.69  | 5.51  | 0.18 | 1.60 | 0.32 | 1.75 | 3.88  | 33.39  | 744.65  |
| Kaifeng      | 0.86 | 4.41 | 10.42 | 12.26 | 0.44 | 3.50 | 0.70 | 4.05 | 8.94  | 76.86  | 1717.98 |
| Luoyang      | 0.49 | 2.48 | 6.06  | 7.13  | 0.23 | 2.03 | 0.40 | 2.24 | 4.91  | 41.89  | 946.12  |
| Pingdingshan | 0.46 | 2.35 | 5.60  | 6.59  | 0.22 | 1.90 | 0.38 | 2.10 | 4.65  | 39.91  | 896.96  |
| Anyang       | 0.64 | 3.28 | 7.76  | 9.12  | 0.33 | 2.61 | 0.52 | 3.01 | 6.65  | 57.22  | 1278.89 |
| Hebi         | 0.20 | 1.01 | 2.40  | 2.82  | 0.10 | 0.81 | 0.16 | 0.93 | 2.06  | 17.70  | 395.56  |
| Xinxiang     | 0.69 | 3.57 | 8.44  | 9.93  | 0.36 | 2.84 | 0.57 | 3.28 | 7.24  | 62.25  | 1391.43 |
| Jiaozuo      | 0.43 | 2.19 | 5.18  | 6.09  | 0.22 | 1.74 | 0.35 | 2.01 | 4.44  | 38.17  | 853.19  |
| Puyang       | 0.48 | 2.49 | 5.89  | 6.92  | 0.25 | 1.98 | 0.39 | 2.29 | 5.05  | 43.40  | 970.11  |
| Xuchang      | 0.57 | 2.95 | 6.98  | 8.21  | 0.30 | 2.35 | 0.47 | 2.71 | 5.99  | 51.49  | 1150.90 |
| Luohe        | 0.37 | 1.78 | 4.47  | 5.04  | 0.17 | 1.44 | 0.25 | 1.60 | 3.51  | 31.05  | 708.81  |
| Sanmenxia    | 0.13 | 0.64 | 1.55  | 1.88  | 0.06 | 0.53 | 0.10 | 0.60 | 1.33  | 11.02  | 256.06  |
| Nanyang      | 1.52 | 8.16 | 17.53 | 21.87 | 0.81 | 6.38 | 1.48 | 7.52 | 17.01 | 143.47 | 3104.69 |
| Shangqiu     | 1.45 | 7.13 | 17.09 | 19.87 | 0.69 | 5.71 | 1.06 | 6.50 | 14.41 | 125.45 | 2856.67 |
| Xinyang      | 0.94 | 5.53 | 14.85 | 17.67 | 0.76 | 4.38 | 1.02 | 5.93 | 12.26 | 96.63  | 2112.64 |
| Zhoukou      | 1.39 | 7.15 | 16.91 | 19.88 | 0.72 | 5.68 | 1.13 | 6.57 | 14.50 | 124.67 | 2786.72 |

|             |      |      |       |       |      |      |      |      |       |        |         |
|-------------|------|------|-------|-------|------|------|------|------|-------|--------|---------|
| Zhumadian   | 1.23 | 6.35 | 15.02 | 17.67 | 0.64 | 5.05 | 1.01 | 5.84 | 12.88 | 110.77 | 2475.88 |
| Wuhan       | 0.36 | 2.16 | 6.24  | 7.42  | 0.29 | 1.78 | 0.43 | 2.39 | 4.84  | 37.10  | 802.70  |
| Huangshi    | 0.18 | 1.11 | 3.07  | 3.70  | 0.15 | 0.90 | 0.23 | 1.20 | 2.46  | 18.85  | 403.46  |
| Shiyan      | 0.38 | 2.10 | 5.05  | 6.28  | 0.21 | 1.72 | 0.41 | 2.00 | 4.35  | 34.76  | 759.24  |
| Jingzhou    | 1.14 | 6.80 | 19.66 | 23.20 | 0.96 | 5.54 | 1.35 | 7.57 | 15.37 | 119.21 | 2552.65 |
| Yichang     | 0.55 | 3.19 | 8.19  | 9.91  | 0.34 | 2.63 | 0.64 | 3.11 | 6.61  | 52.85  | 1125.87 |
| Xiangyang   | 1.40 | 7.44 | 20.08 | 22.94 | 0.90 | 5.98 | 1.18 | 7.47 | 15.64 | 130.37 | 2925.44 |
| Ezhou       | 0.10 | 0.62 | 1.72  | 2.09  | 0.09 | 0.50 | 0.13 | 0.69 | 1.40  | 10.63  | 226.00  |
| Jingmen     | 0.78 | 4.57 | 12.68 | 15.10 | 0.61 | 3.70 | 0.88 | 4.94 | 10.15 | 79.24  | 1722.72 |
| Xiaogan     | 0.58 | 3.47 | 10.24 | 11.97 | 0.50 | 2.82 | 0.66 | 3.91 | 7.85  | 60.80  | 1322.68 |
| Huanggang   | 0.91 | 5.66 | 15.60 | 18.88 | 0.78 | 4.56 | 1.18 | 6.22 | 12.75 | 97.63  | 2060.72 |
| Xianning    | 0.28 | 1.68 | 4.95  | 5.85  | 0.23 | 1.39 | 0.33 | 1.86 | 3.73  | 28.30  | 617.42  |
| Suizhou     | 0.39 | 2.20 | 6.41  | 7.37  | 0.31 | 1.78 | 0.38 | 2.41 | 4.87  | 38.73  | 862.15  |
| Enshi       | 0.51 | 2.94 | 7.25  | 8.96  | 0.27 | 2.46 | 0.60 | 2.72 | 5.88  | 46.76  | 1002.61 |
| Changsha    | 0.64 | 3.86 | 13.09 | 14.75 | 0.61 | 3.25 | 0.70 | 4.58 | 8.73  | 65.50  | 1472.10 |
| Zhuzhou     | 0.46 | 2.76 | 9.52  | 10.68 | 0.45 | 2.32 | 0.49 | 3.31 | 6.27  | 46.85  | 1057.13 |
| Xiangtan    | 0.37 | 2.22 | 7.87  | 8.72  | 0.37 | 1.88 | 0.39 | 2.69 | 5.04  | 37.74  | 855.14  |
| Hengyang    | 0.93 | 5.71 | 18.02 | 20.88 | 0.87 | 4.73 | 1.10 | 6.62 | 12.91 | 96.88  | 2130.83 |
| Shaoyang    | 1.14 | 7.07 | 19.43 | 23.57 | 0.92 | 5.78 | 1.47 | 7.56 | 15.49 | 118.05 | 2518.86 |
| Yueyang     | 0.87 | 5.24 | 17.12 | 19.48 | 0.80 | 4.38 | 0.96 | 6.07 | 11.71 | 88.41  | 1967.37 |
| Changde     | 1.18 | 7.29 | 21.74 | 25.60 | 1.04 | 5.99 | 1.44 | 8.17 | 16.25 | 122.91 | 2666.98 |
| Zhangjiajie | 0.21 | 1.25 | 3.37  | 4.06  | 0.14 | 1.04 | 0.25 | 1.26 | 2.61  | 20.35  | 439.04  |
| Yiyang      | 0.70 | 4.28 | 13.52 | 15.58 | 0.65 | 3.54 | 0.82 | 4.92 | 9.59  | 72.29  | 1587.91 |
| Chenzhou    | 0.53 | 3.12 | 9.93  | 11.40 | 0.45 | 2.63 | 0.58 | 3.52 | 6.89  | 52.20  | 1163.96 |
| Yongzhou    | 0.85 | 5.03 | 16.50 | 18.87 | 0.75 | 4.25 | 0.92 | 5.84 | 11.28 | 84.71  | 1909.31 |
| Huaihua     | 0.56 | 3.33 | 10.14 | 11.71 | 0.44 | 2.79 | 0.63 | 3.61 | 7.16  | 55.11  | 1210.78 |
| Loudi       | 0.45 | 2.57 | 8.68  | 9.69  | 0.37 | 2.20 | 0.44 | 2.92 | 5.60  | 42.79  | 972.34  |
| Guangzhou   | 0.04 | 0.23 | 0.76  | 0.89  | 0.04 | 0.22 | 0.06 | 0.31 | 0.63  | 4.17   | 96.45   |
| Shenzhen    | 0.00 | 0.02 | 0.05  | 0.07  | 0.00 | 0.02 | 0.00 | 0.02 | 0.05  | 0.33   | 7.18    |
| Zhuhai      | 0.03 | 0.15 | 0.43  | 0.52  | 0.02 | 0.13 | 0.04 | 0.18 | 0.36  | 2.60   | 56.55   |
| Dongguan    | 0.00 | 0.01 | 0.02  | 0.03  | 0.00 | 0.01 | 0.00 | 0.01 | 0.02  | 0.15   | 2.94    |
| Foshan      | 0.08 | 0.46 | 1.30  | 1.59  | 0.07 | 0.40 | 0.11 | 0.54 | 1.10  | 7.90   | 172.13  |
| Zhongshan   | 0.04 | 0.23 | 0.65  | 0.79  | 0.03 | 0.20 | 0.05 | 0.27 | 0.55  | 3.96   | 86.21   |
| Huizhou     | 0.06 | 0.41 | 1.11  | 1.38  | 0.06 | 0.33 | 0.09 | 0.46 | 0.94  | 6.94   | 147.20  |
| Shantou     | 0.05 | 0.34 | 0.89  | 1.10  | 0.05 | 0.27 | 0.07 | 0.37 | 0.75  | 5.65   | 118.09  |
| Jiangmen    | 0.11 | 0.65 | 2.16  | 2.48  | 0.11 | 0.56 | 0.13 | 0.79 | 1.53  | 11.18  | 250.58  |
| Maoming     | 0.21 | 1.25 | 3.54  | 4.32  | 0.18 | 1.08 | 0.29 | 1.46 | 3.01  | 21.51  | 468.70  |
| Zhaoqing    | 0.16 | 0.93 | 2.62  | 3.20  | 0.13 | 0.80 | 0.22 | 1.08 | 2.23  | 15.96  | 347.73  |
| Zhanjiang   | 0.33 | 1.52 | 4.18  | 5.36  | 0.25 | 1.65 | 0.52 | 2.16 | 4.74  | 28.77  | 658.73  |
| Meizhou     | 0.10 | 0.60 | 1.70  | 2.07  | 0.09 | 0.52 | 0.14 | 0.70 | 1.44  | 10.32  | 224.85  |
| Shanwei     | 0.06 | 0.38 | 1.07  | 1.30  | 0.05 | 0.33 | 0.09 | 0.44 | 0.91  | 6.49   | 141.39  |

|               |      |       |       |       |      |       |      |       |       |        |         |
|---------------|------|-------|-------|-------|------|-------|------|-------|-------|--------|---------|
| Heyuan        | 0.05 | 0.30  | 0.85  | 1.04  | 0.04 | 0.26  | 0.07 | 0.35  | 0.72  | 5.17   | 112.71  |
| Qingyuan      | 0.10 | 0.60  | 1.70  | 2.08  | 0.09 | 0.52  | 0.14 | 0.70  | 1.45  | 10.37  | 225.96  |
| Shaoguan      | 0.08 | 0.48  | 1.36  | 1.67  | 0.07 | 0.42  | 0.11 | 0.56  | 1.16  | 8.30   | 180.87  |
| Jieyang       | 0.09 | 0.54  | 1.53  | 1.86  | 0.08 | 0.47  | 0.13 | 0.63  | 1.30  | 9.28   | 202.20  |
| Yangjiang     | 0.11 | 0.66  | 1.87  | 2.29  | 0.10 | 0.57  | 0.15 | 0.77  | 1.59  | 11.40  | 248.37  |
| Chaozhou      | 0.04 | 0.21  | 0.59  | 0.72  | 0.03 | 0.18  | 0.05 | 0.24  | 0.50  | 3.59   | 78.23   |
| Yunfu         | 0.08 | 0.48  | 1.36  | 1.66  | 0.07 | 0.42  | 0.11 | 0.56  | 1.16  | 8.28   | 180.52  |
| Nanning       | 0.84 | 3.73  | 11.56 | 13.93 | 0.59 | 4.10  | 1.14 | 5.17  | 11.04 | 68.74  | 1632.99 |
| Guilin        | 0.47 | 2.77  | 8.77  | 10.23 | 0.41 | 2.36  | 0.54 | 3.23  | 6.35  | 46.83  | 1053.52 |
| Liuzhou       | 0.35 | 1.38  | 4.56  | 5.53  | 0.26 | 1.73  | 0.52 | 2.25  | 4.87  | 27.45  | 676.80  |
| Wuzhou        | 0.26 | 1.16  | 3.66  | 4.38  | 0.19 | 1.27  | 0.35 | 1.63  | 3.46  | 21.51  | 509.20  |
| Qinzhou       | 0.43 | 1.93  | 6.05  | 7.26  | 0.32 | 2.10  | 0.59 | 2.70  | 5.72  | 35.61  | 842.76  |
| Beihai        | 0.33 | 1.48  | 4.66  | 5.59  | 0.24 | 1.62  | 0.45 | 2.08  | 4.41  | 27.45  | 649.55  |
| Yulin         | 0.55 | 2.47  | 7.76  | 9.31  | 0.41 | 2.69  | 0.75 | 3.46  | 7.34  | 45.68  | 1081.06 |
| Guigang       | 0.43 | 2.38  | 7.31  | 8.62  | 0.36 | 2.16  | 0.54 | 2.88  | 5.84  | 41.08  | 925.00  |
| Fangchenggang | 0.16 | 0.70  | 2.20  | 2.64  | 0.12 | 0.76  | 0.21 | 0.98  | 2.08  | 12.95  | 306.61  |
| Baise         | 0.35 | 1.58  | 4.95  | 5.94  | 0.26 | 1.72  | 0.48 | 2.21  | 4.68  | 29.14  | 689.62  |
| Chongzuo      | 0.32 | 1.46  | 4.59  | 5.51  | 0.24 | 1.59  | 0.44 | 2.05  | 4.34  | 27.04  | 639.96  |
| Laibin        | 0.48 | 1.60  | 5.08  | 6.47  | 0.32 | 2.32  | 0.76 | 2.94  | 6.63  | 34.24  | 865.80  |
| Hezhou        | 0.22 | 0.98  | 3.08  | 3.69  | 0.16 | 1.07  | 0.30 | 1.37  | 2.91  | 18.10  | 428.42  |
| Hechi         | 0.30 | 1.36  | 4.28  | 5.13  | 0.22 | 1.49  | 0.41 | 1.91  | 4.05  | 25.20  | 596.37  |
| Haikou        | 0.06 | 0.39  | 1.11  | 1.35  | 0.06 | 0.33  | 0.09 | 0.45  | 0.92  | 6.72   | 143.69  |
| Sanya         | 0.02 | 0.12  | 0.38  | 0.45  | 0.02 | 0.10  | 0.02 | 0.14  | 0.28  | 2.10   | 45.64   |
| Chongqing     | 3.19 | 18.70 | 50.13 | 61.50 | 2.20 | 15.51 | 3.79 | 19.38 | 40.31 | 308.67 | 6743.70 |
| Chengdu       | 0.51 | 3.01  | 8.08  | 9.81  | 0.39 | 2.43  | 0.59 | 3.21  | 6.65  | 51.33  | 1118.08 |
| Zigong        | 2.79 | 16.11 | 42.20 | 51.22 | 1.89 | 13.16 | 3.12 | 16.43 | 34.48 | 270.38 | 5906.66 |
| Panzhihua     | 0.07 | 0.38  | 1.01  | 1.22  | 0.05 | 0.31  | 0.07 | 0.39  | 0.82  | 6.45   | 140.83  |
| Luzhou        | 0.37 | 2.11  | 5.54  | 6.72  | 0.25 | 1.73  | 0.41 | 2.16  | 4.53  | 35.49  | 775.38  |
| Deyang        | 0.44 | 2.48  | 6.53  | 7.80  | 0.31 | 1.98  | 0.45 | 2.57  | 5.38  | 42.78  | 944.20  |
| Mianyang      | 0.56 | 3.18  | 7.89  | 9.67  | 0.37 | 2.55  | 0.61 | 3.18  | 6.80  | 54.25  | 1178.83 |
| Guangyuan     | 0.22 | 1.27  | 3.32  | 4.03  | 0.15 | 1.04  | 0.25 | 1.29  | 2.71  | 21.28  | 464.87  |
| Suining       | 0.31 | 1.80  | 4.72  | 5.73  | 0.21 | 1.47  | 0.35 | 1.84  | 3.85  | 30.23  | 660.40  |
| Neijiang      | 0.42 | 2.42  | 6.33  | 7.68  | 0.28 | 1.97  | 0.47 | 2.46  | 5.17  | 40.55  | 885.76  |
| Leshan        | 0.31 | 1.79  | 4.68  | 5.68  | 0.21 | 1.46  | 0.35 | 1.82  | 3.83  | 30.00  | 655.44  |
| Nanchong      | 0.71 | 4.10  | 10.75 | 13.05 | 0.48 | 3.35  | 0.80 | 4.19  | 8.78  | 68.87  | 1504.47 |
| Yibin         | 0.47 | 2.74  | 7.17  | 8.70  | 0.32 | 2.24  | 0.53 | 2.79  | 5.86  | 45.94  | 1003.53 |
| Guangan       | 0.35 | 2.03  | 5.31  | 6.45  | 0.24 | 1.66  | 0.39 | 2.07  | 4.34  | 34.03  | 743.52  |
| Dazhou        | 0.64 | 3.67  | 9.62  | 11.67 | 0.43 | 3.00  | 0.71 | 3.74  | 7.86  | 61.61  | 1345.91 |
| Meishan       | 0.34 | 1.98  | 5.18  | 6.28  | 0.23 | 1.61  | 0.38 | 2.02  | 4.23  | 33.16  | 724.43  |
| Yaan          | 0.10 | 0.57  | 1.55  | 1.87  | 0.06 | 0.48  | 0.11 | 0.58  | 1.21  | 9.44   | 210.11  |
| Bazhong       | 0.19 | 1.07  | 2.80  | 3.39  | 0.13 | 0.87  | 0.21 | 1.09  | 2.28  | 17.91  | 391.22  |

|            |      |      |      |       |      |      |      |      |      |       |         |
|------------|------|------|------|-------|------|------|------|------|------|-------|---------|
| Ziyang     | 0.56 | 3.20 | 8.38 | 10.18 | 0.38 | 2.61 | 0.62 | 3.26 | 6.85 | 53.71 | 1173.37 |
| Guiyang    | 0.21 | 1.21 | 2.73 | 3.48  | 0.11 | 1.00 | 0.26 | 1.11 | 2.48 | 19.69 | 414.75  |
| Liupanshui | 0.11 | 0.64 | 1.81 | 2.12  | 0.08 | 0.54 | 0.12 | 0.66 | 1.35 | 10.56 | 232.16  |
| Zunyi      | 0.54 | 3.27 | 7.85 | 9.89  | 0.36 | 2.66 | 0.70 | 3.22 | 6.94 | 53.98 | 1132.00 |
| Anshun     | 0.13 | 0.82 | 1.72 | 2.29  | 0.08 | 0.66 | 0.19 | 0.76 | 1.71 | 13.40 | 274.43  |
| Bijie      | 0.43 | 2.53 | 6.50 | 7.94  | 0.28 | 2.09 | 0.52 | 2.53 | 5.34 | 41.67 | 892.30  |
| Tongren    | 0.30 | 1.78 | 4.24 | 5.32  | 0.18 | 1.46 | 0.38 | 1.71 | 3.72 | 29.17 | 615.58  |
| Kunming    | 0.26 | 1.32 | 3.66 | 4.32  | 0.12 | 1.14 | 0.23 | 1.25 | 2.62 | 21.00 | 484.79  |
| Qujing     | 0.67 | 3.71 | 9.03 | 11.35 | 0.33 | 3.12 | 0.75 | 3.45 | 7.52 | 59.41 | 1295.23 |
| Yuxi       | 0.17 | 0.83 | 2.34 | 2.74  | 0.08 | 0.77 | 0.17 | 0.85 | 1.81 | 13.56 | 313.37  |
| Baoshan    | 0.33 | 1.65 | 4.80 | 5.69  | 0.19 | 1.53 | 0.35 | 1.79 | 3.75 | 27.45 | 635.87  |
| Zhaotong   | 0.39 | 1.99 | 5.66 | 6.49  | 0.16 | 1.75 | 0.33 | 1.79 | 3.75 | 30.86 | 714.32  |
| Lijiang    | 0.10 | 0.52 | 1.41 | 1.76  | 0.06 | 0.45 | 0.10 | 0.54 | 1.15 | 8.72  | 204.85  |
| Pu'er      | 0.30 | 1.44 | 4.36 | 5.03  | 0.16 | 1.40 | 0.31 | 1.58 | 3.32 | 24.02 | 567.66  |
| Lincang    | 0.37 | 1.44 | 4.22 | 5.15  | 0.19 | 1.69 | 0.46 | 1.93 | 4.30 | 26.49 | 651.98  |
| Lhasa      | 0.02 | 0.10 | 0.20 | 0.25  | 0.01 | 0.07 | 0.02 | 0.10 | 0.22 | 1.91  | 42.33   |
| Qamdo      | 0.01 | 0.04 | 0.09 | 0.11  | 0.00 | 0.03 | 0.01 | 0.04 | 0.09 | 0.76  | 17.08   |
| Shannan    | 0.02 | 0.11 | 0.21 | 0.27  | 0.01 | 0.08 | 0.02 | 0.11 | 0.24 | 2.05  | 45.86   |
| Xigaze     | 0.02 | 0.14 | 0.24 | 0.35  | 0.01 | 0.10 | 0.03 | 0.13 | 0.31 | 2.45  | 52.58   |
| Nyingchi   | 0.01 | 0.05 | 0.12 | 0.14  | 0.01 | 0.04 | 0.01 | 0.05 | 0.12 | 1.01  | 22.80   |
| Weinan     | 0.57 | 2.78 | 7.39 | 8.15  | 0.24 | 2.33 | 0.41 | 2.46 | 5.36 | 48.16 | 1076.19 |
| Yan'an     | 0.16 | 0.78 | 2.23 | 2.54  | 0.05 | 0.70 | 0.13 | 0.67 | 1.42 | 11.86 | 276.58  |
| Hanzhong   | 0.23 | 1.37 | 3.51 | 4.28  | 0.16 | 1.11 | 0.27 | 1.38 | 2.90 | 22.77 | 489.30  |
| Yulin      | 0.26 | 1.30 | 3.56 | 4.19  | 0.09 | 1.16 | 0.23 | 1.14 | 2.44 | 19.99 | 460.28  |
| Ankang     | 0.18 | 1.03 | 2.49 | 3.08  | 0.10 | 0.84 | 0.20 | 0.98 | 2.12 | 16.95 | 365.09  |
| Shangluo   | 0.13 | 0.66 | 1.75 | 2.01  | 0.05 | 0.56 | 0.10 | 0.58 | 1.26 | 10.62 | 247.28  |
| Baoji      | 0.36 | 1.72 | 4.50 | 4.99  | 0.16 | 1.42 | 0.23 | 1.51 | 3.27 | 29.04 | 673.76  |
| Xianyang   | 0.48 | 2.34 | 6.13 | 6.80  | 0.21 | 1.95 | 0.32 | 2.04 | 4.40 | 39.04 | 899.32  |
| Tongchuan  | 0.06 | 0.32 | 0.87 | 0.96  | 0.02 | 0.27 | 0.05 | 0.27 | 0.58 | 5.05  | 115.97  |
| Xi'an      | 0.44 | 2.15 | 5.75 | 6.29  | 0.19 | 1.80 | 0.29 | 1.86 | 4.00 | 35.82 | 828.43  |
| Lanchow    | 0.14 | 0.73 | 1.62 | 2.05  | 0.07 | 0.59 | 0.14 | 0.66 | 1.49 | 12.25 | 267.60  |
| Jiayuguan  | 0.00 | 0.02 | 0.06 | 0.07  | 0.00 | 0.02 | 0.00 | 0.02 | 0.04 | 0.33  | 7.96    |
| Jinchang   | 0.09 | 0.49 | 1.14 | 1.37  | 0.04 | 0.40 | 0.08 | 0.44 | 0.98 | 8.35  | 185.54  |
| Baiyin     | 0.25 | 1.33 | 3.25 | 3.89  | 0.11 | 1.12 | 0.24 | 1.16 | 2.54 | 21.23 | 467.08  |
| Tianshui   | 0.38 | 2.06 | 4.67 | 5.79  | 0.18 | 1.68 | 0.39 | 1.83 | 4.09 | 33.94 | 737.11  |
| Wuwei      | 0.38 | 2.03 | 4.89 | 5.94  | 0.16 | 1.71 | 0.39 | 1.77 | 3.92 | 32.64 | 701.25  |
| Zhangye    | 0.39 | 2.05 | 4.85 | 5.87  | 0.17 | 1.69 | 0.37 | 1.81 | 4.01 | 33.63 | 736.30  |
| Pingliang  | 0.34 | 1.83 | 4.18 | 5.12  | 0.16 | 1.48 | 0.33 | 1.63 | 3.64 | 30.45 | 669.34  |
| Qiuquan    | 0.15 | 0.69 | 1.98 | 2.18  | 0.06 | 0.60 | 0.12 | 0.65 | 1.43 | 12.95 | 274.89  |
| Qingyang   | 0.52 | 2.73 | 6.73 | 7.95  | 0.22 | 2.29 | 0.48 | 2.37 | 5.20 | 44.00 | 973.34  |
| Dingxi     | 0.46 | 2.65 | 5.77 | 7.38  | 0.21 | 2.17 | 0.55 | 2.30 | 5.19 | 42.32 | 886.14  |

---

|            |      |      |      |      |      |      |      |      |      |       |        |
|------------|------|------|------|------|------|------|------|------|------|-------|--------|
| Longnan    | 0.29 | 1.60 | 3.46 | 4.37 | 0.14 | 1.28 | 0.30 | 1.44 | 3.25 | 27.01 | 582.91 |
| Xining     | 0.07 | 0.45 | 0.65 | 1.04 | 0.04 | 0.33 | 0.11 | 0.41 | 0.99 | 7.86  | 151.89 |
| Haidong    | 0.11 | 0.74 | 1.01 | 1.69 | 0.07 | 0.54 | 0.19 | 0.67 | 1.62 | 12.71 | 239.80 |
| Yinchuan   | 0.10 | 0.54 | 1.69 | 1.85 | 0.06 | 0.47 | 0.08 | 0.52 | 1.04 | 8.63  | 198.38 |
| Shizuishan | 0.07 | 0.38 | 1.07 | 1.20 | 0.03 | 0.33 | 0.06 | 0.33 | 0.69 | 5.85  | 131.65 |
| Wuzhong    | 0.17 | 0.92 | 2.32 | 2.74 | 0.08 | 0.77 | 0.17 | 0.80 | 1.73 | 14.43 | 312.22 |
| Guyuan     | 0.26 | 1.73 | 2.74 | 4.23 | 0.15 | 1.31 | 0.44 | 1.54 | 3.66 | 28.64 | 547.41 |
| Zhongwei   | 0.14 | 0.82 | 1.78 | 2.28 | 0.07 | 0.67 | 0.17 | 0.71 | 1.60 | 12.97 | 267.63 |
| Urumqi     | 0.06 | 0.35 | 0.69 | 0.96 | 0.04 | 0.27 | 0.08 | 0.34 | 0.76 | 6.00  | 119.45 |
| Karamay    | 0.02 | 0.09 | 0.27 | 0.28 | 0.01 | 0.08 | 0.02 | 0.09 | 0.20 | 1.99  | 35.45  |
| Turpan     | 0.04 | 0.15 | 0.51 | 0.49 | 0.01 | 0.14 | 0.03 | 0.15 | 0.35 | 3.75  | 62.86  |
| Hami       | 0.08 | 0.37 | 1.02 | 1.08 | 0.04 | 0.31 | 0.08 | 0.37 | 0.86 | 8.42  | 156.57 |

---

**Table S6. Monthly coefficients of pollutant emissions in different regions.**

| Regions                                       | Crops      | Month |       |       |       |       |       |       |       |       |       |       |       |
|-----------------------------------------------|------------|-------|-------|-------|-------|-------|-------|-------|-------|-------|-------|-------|-------|
|                                               |            | Jan   | Feb   | Mar   | Apr   | May   | Jun   | Jul   | Aug   | Sept  | Oct   | Nov   | Dec   |
| Northeast China                               | Rice       | 0.042 | 0.042 | 0.042 | 0.042 | 0.042 | 0.042 | 0.042 | 0.042 | 0.292 | 0.292 | 0.042 | 0.042 |
|                                               | Wheat      | 0.042 | 0.042 | 0.042 | 0.042 | 0.042 | 0.042 | 0.292 | 0.292 | 0.042 | 0.042 | 0.042 | 0.042 |
|                                               | Corn       | 0.042 | 0.042 | 0.042 | 0.042 | 0.042 | 0.042 | 0.042 | 0.042 | 0.292 | 0.292 | 0.042 | 0.042 |
|                                               | Legume     | 0.042 | 0.042 | 0.042 | 0.042 | 0.042 | 0.042 | 0.042 | 0.042 | 0.292 | 0.292 | 0.042 | 0.042 |
|                                               | Tuber crop | 0.042 | 0.042 | 0.042 | 0.042 | 0.042 | 0.208 | 0.208 | 0.208 | 0.042 | 0.042 | 0.042 | 0.042 |
|                                               | Oil plant  | 0.042 | 0.042 | 0.042 | 0.042 | 0.042 | 0.042 | 0.292 | 0.292 | 0.042 | 0.042 | 0.042 | 0.042 |
|                                               | Cotton     | 0.042 | 0.042 | 0.042 | 0.042 | 0.042 | 0.042 | 0.042 | 0.042 | 0.208 | 0.208 | 0.208 | 0.042 |
|                                               | Sugarcane  | 0.142 | 0.142 | 0.142 | 0.042 | 0.042 | 0.042 | 0.042 | 0.042 | 0.042 | 0.042 | 0.142 | 0.142 |
|                                               | Fiber crop | 0.042 | 0.042 | 0.042 | 0.042 | 0.042 | 0.042 | 0.042 | 0.042 | 0.292 | 0.292 | 0.042 | 0.042 |
| North China                                   | Rice       | 0.042 | 0.042 | 0.042 | 0.042 | 0.042 | 0.042 | 0.042 | 0.042 | 0.292 | 0.292 | 0.042 | 0.042 |
|                                               | Wheat      | 0.042 | 0.042 | 0.042 | 0.042 | 0.042 | 0.292 | 0.292 | 0.042 | 0.042 | 0.042 | 0.042 | 0.042 |
|                                               | Corn       | 0.042 | 0.042 | 0.042 | 0.042 | 0.042 | 0.042 | 0.042 | 0.042 | 0.042 | 0.292 | 0.292 | 0.042 |
|                                               | Legume     | 0.042 | 0.042 | 0.042 | 0.042 | 0.042 | 0.042 | 0.042 | 0.042 | 0.208 | 0.208 | 0.208 | 0.042 |
|                                               | Tuber crop | 0.042 | 0.042 | 0.042 | 0.042 | 0.042 | 0.167 | 0.167 | 0.042 | 0.042 | 0.167 | 0.167 | 0.042 |
|                                               | Oil plant  | 0.042 | 0.042 | 0.042 | 0.042 | 0.042 | 0.292 | 0.292 | 0.042 | 0.042 | 0.042 | 0.042 | 0.042 |
|                                               | Cotton     | 0.042 | 0.042 | 0.042 | 0.042 | 0.042 | 0.042 | 0.042 | 0.042 | 0.042 | 0.292 | 0.292 | 0.042 |
|                                               | Sugarcane  | 0.142 | 0.142 | 0.142 | 0.042 | 0.042 | 0.042 | 0.042 | 0.042 | 0.042 | 0.042 | 0.142 | 0.142 |
|                                               | Fiber crop | 0.042 | 0.042 | 0.042 | 0.042 | 0.042 | 0.042 | 0.042 | 0.042 | 0.292 | 0.292 | 0.042 | 0.042 |
| Northwest China                               | Rice       | 0.042 | 0.042 | 0.042 | 0.042 | 0.042 | 0.042 | 0.042 | 0.208 | 0.208 | 0.208 | 0.042 | 0.042 |
|                                               | Wheat      | 0.042 | 0.042 | 0.042 | 0.042 | 0.042 | 0.208 | 0.208 | 0.208 | 0.042 | 0.042 | 0.042 | 0.042 |
|                                               | Corn       | 0.042 | 0.042 | 0.042 | 0.042 | 0.042 | 0.042 | 0.042 | 0.042 | 0.208 | 0.208 | 0.208 | 0.042 |
|                                               | Legume     | 0.042 | 0.042 | 0.042 | 0.042 | 0.042 | 0.042 | 0.042 | 0.042 | 0.292 | 0.292 | 0.042 | 0.042 |
|                                               | Tuber crop | 0.042 | 0.042 | 0.042 | 0.042 | 0.042 | 0.167 | 0.167 | 0.042 | 0.042 | 0.167 | 0.167 | 0.042 |
|                                               | Oil plant  | 0.042 | 0.042 | 0.042 | 0.042 | 0.042 | 0.292 | 0.292 | 0.042 | 0.042 | 0.042 | 0.042 | 0.042 |
|                                               | Cotton     | 0.042 | 0.042 | 0.042 | 0.042 | 0.042 | 0.042 | 0.042 | 0.042 | 0.292 | 0.292 | 0.042 | 0.042 |
|                                               | Sugarcane  | 0.142 | 0.142 | 0.142 | 0.042 | 0.042 | 0.042 | 0.042 | 0.042 | 0.042 | 0.042 | 0.142 | 0.142 |
|                                               | Fiber crop | 0.042 | 0.042 | 0.042 | 0.042 | 0.042 | 0.042 | 0.042 | 0.042 | 0.292 | 0.292 | 0.042 | 0.042 |
| the middle and lower reaches of Yangtze River | Rice       | 0.042 | 0.042 | 0.042 | 0.042 | 0.042 | 0.208 | 0.208 | 0.042 | 0.042 | 0.208 | 0.042 | 0.042 |
|                                               | Wheat      | 0.042 | 0.042 | 0.042 | 0.042 | 0.292 | 0.292 | 0.042 | 0.042 | 0.042 | 0.042 | 0.042 | 0.042 |
|                                               | Corn       | 0.042 | 0.042 | 0.042 | 0.042 | 0.042 | 0.042 | 0.042 | 0.208 | 0.208 | 0.208 | 0.042 | 0.042 |
|                                               | Legume     | 0.042 | 0.042 | 0.042 | 0.042 | 0.042 | 0.042 | 0.042 | 0.042 | 0.042 | 0.292 | 0.292 | 0.042 |
|                                               | Tuber crop | 0.042 | 0.042 | 0.042 | 0.042 | 0.167 | 0.167 | 0.042 | 0.042 | 0.042 | 0.167 | 0.167 | 0.042 |
|                                               | Oil plant  | 0.042 | 0.042 | 0.042 | 0.042 | 0.292 | 0.292 | 0.042 | 0.042 | 0.042 | 0.042 | 0.042 | 0.042 |
|                                               | Cotton     | 0.042 | 0.042 | 0.042 | 0.042 | 0.042 | 0.042 | 0.042 | 0.042 | 0.042 | 0.292 | 0.292 | 0.042 |
|                                               | Sugarcane  | 0.167 | 0.042 | 0.042 | 0.042 | 0.042 | 0.042 | 0.042 | 0.042 | 0.042 | 0.167 | 0.167 | 0.167 |
|                                               | Fiber crop | 0.042 | 0.042 | 0.042 | 0.042 | 0.042 | 0.042 | 0.042 | 0.042 | 0.292 | 0.292 | 0.042 | 0.042 |
| Southwest                                     | Rice       | 0.042 | 0.042 | 0.042 | 0.042 | 0.042 | 0.167 | 0.167 | 0.042 | 0.167 | 0.167 | 0.042 | 0.042 |

|             |            |       |       |       |       |       |       |       |       |       |       |       |       |
|-------------|------------|-------|-------|-------|-------|-------|-------|-------|-------|-------|-------|-------|-------|
| China       | Wheat      | 0.042 | 0.042 | 0.042 | 0.042 | 0.542 | 0.042 | 0.042 | 0.042 | 0.042 | 0.042 | 0.042 | 0.042 |
|             | Corn       | 0.042 | 0.042 | 0.042 | 0.042 | 0.042 | 0.042 | 0.208 | 0.208 | 0.208 | 0.042 | 0.042 | 0.042 |
|             | Legume     | 0.042 | 0.042 | 0.042 | 0.042 | 0.042 | 0.042 | 0.042 | 0.042 | 0.042 | 0.292 | 0.292 | 0.042 |
|             | Tuber crop | 0.042 | 0.042 | 0.042 | 0.042 | 0.167 | 0.167 | 0.042 | 0.042 | 0.042 | 0.167 | 0.167 | 0.042 |
|             | Oil plant  | 0.042 | 0.042 | 0.042 | 0.042 | 0.292 | 0.292 | 0.042 | 0.042 | 0.042 | 0.042 | 0.042 | 0.042 |
|             | Cotton     | 0.042 | 0.042 | 0.042 | 0.042 | 0.042 | 0.042 | 0.042 | 0.042 | 0.042 | 0.292 | 0.292 | 0.042 |
|             | Sugarcane  | 0.125 | 0.125 | 0.125 | 0.125 | 0.042 | 0.042 | 0.042 | 0.042 | 0.042 | 0.042 | 0.125 | 0.125 |
|             | Fiber crop | 0.042 | 0.042 | 0.042 | 0.042 | 0.042 | 0.042 | 0.042 | 0.042 | 0.292 | 0.292 | 0.042 | 0.042 |
| South China | Rice       | 0.042 | 0.042 | 0.042 | 0.042 | 0.142 | 0.142 | 0.142 | 0.042 | 0.042 | 0.042 | 0.142 | 0.142 |
|             | Wheat      | 0.042 | 0.042 | 0.042 | 0.292 | 0.292 | 0.042 | 0.042 | 0.042 | 0.042 | 0.042 | 0.042 | 0.042 |
|             | Corn       | 0.042 | 0.042 | 0.042 | 0.042 | 0.042 | 0.167 | 0.167 | 0.042 | 0.167 | 0.167 | 0.042 | 0.042 |
|             | Legume     | 0.042 | 0.042 | 0.042 | 0.042 | 0.042 | 0.292 | 0.042 | 0.042 | 0.042 | 0.042 | 0.292 | 0.042 |
|             | Tuber crop | 0.042 | 0.042 | 0.042 | 0.042 | 0.167 | 0.167 | 0.042 | 0.042 | 0.042 | 0.167 | 0.167 | 0.042 |
|             | Oil plant  | 0.042 | 0.042 | 0.042 | 0.042 | 0.292 | 0.292 | 0.042 | 0.042 | 0.042 | 0.042 | 0.042 | 0.042 |
|             | Cotton     | 0.042 | 0.042 | 0.042 | 0.042 | 0.042 | 0.042 | 0.042 | 0.042 | 0.042 | 0.208 | 0.208 | 0.208 |
|             | Sugarcane  | 0.142 | 0.142 | 0.142 | 0.042 | 0.042 | 0.042 | 0.042 | 0.042 | 0.042 | 0.042 | 0.142 | 0.142 |
| Fiber crop  | 0.042      | 0.042 | 0.042 | 0.042 | 0.042 | 0.042 | 0.042 | 0.042 | 0.208 | 0.208 | 0.208 | 0.042 |       |

**Table S7. Parameters for uncertainty analysis on EFs.**

| Pollutants      | Crops  | Samples | Mean (g kg <sup>-1</sup> ) | Standard Deviation (SD) | Coefficients of variation (CV, %) |
|-----------------|--------|---------|----------------------------|-------------------------|-----------------------------------|
| BC              | Rice   | 5       | 0.58                       | 0.14                    | 24                                |
|                 | Wheat  | 4       | 0.68                       | 0.17                    | 26                                |
|                 | Corn   | 5       | 0.75                       | 0.14                    | 19                                |
|                 | Others | 7       | 0.63                       | 0.13                    | 20                                |
| CO              | Rice   | 6       | 59.20                      | 15.63                   | 26                                |
|                 | Wheat  | 3       | 62.20                      | 2.38                    | 4                                 |
|                 | Corn   | 3       | 54.50                      | 12.25                   | 22                                |
|                 | Others | 9       | 80.59                      | 16.34                   | 20                                |
| CO <sub>2</sub> | Rice   | 4       | 1355.95                    | 273.87                  | 20                                |
|                 | Wheat  | 4       | 1455.38                    | 86.10                   | 6                                 |
|                 | Corn   | 3       | 1257.17                    | 77.63                   | 6                                 |
|                 | Others | 7       | 1445.09                    | 143.69                  | 10                                |
| OC              | Rice   | 4       | 3.50                       | 2.54                    | 73                                |
|                 | Wheat  | 3       | 3.15                       | 0.49                    | 15                                |
|                 | Corn   | 4       | 3.71                       | 1.42                    | 38                                |
|                 | Others | 5       | 4.80                       | 0.96                    | 20                                |
| NMVOC           | Rice   | 3       | 7.95                       | 1.40                    | 18                                |
|                 | Wheat  | 3       | 6.79                       | 2.45                    | 36                                |
|                 | Corn   | 4       | 6.19                       | 2.71                    | 44                                |
|                 | Others | 4       | 10.60                      | 3.12                    | 29                                |



## Supplementary References

- [1] Akagi, S. K., Yokelson, R. J., Wiedinmyer, C., Alvarado, M. J., Reid, J. S., Karl, T., Crounse, J. D., and Wennberg, P. O.: Emission factors for open and domestic biomass burning for use in atmospheric models, *Atmos. Chem. Phys.*, 11, 4039–4072, doi: 10.5194/acp-11-4039-2011, 2011.
- 5 [2] Bond, T. C., Streets, D. G., and Yarber, K. F.: A technology-based global inventory of black and organic carbon emissions from combustion, *J. Geophys. Res.*, 109, doi: 10.1029/2003jd003697, 2004.
- [3] Cao, G., Zhang, X., and Wang, Y.: Inventory on Black Carbon Emission from China, *Adv. Clim. Chang. Res.*, 2, 259–264, 2006 (in Chinese).
- [4] Cao, G., Zhang, X., Wang, Y., and Zheng, F.: Estimation of emissions from field burning of crop straw in China, *Sci. Bull.*, 53, 784–
- 10 790, doi: 10.1007/s11434-008-0145-4, 2008.
- [5] Habib, G., Venkataraman, C., Shrivastava, M., Banerjee, R., Stehr, J. W., and Dickerson, R. R.: New methodology for estimating biofuel consumption for cooking: Atmospheric emissions of black carbon and sulfur dioxide from India, *Global Biogeochem. Cy.*, 18, GB3007, doi: 10.1029/2003gb002157, 2004.
- [6] Huang, X., Li, M., Li, J., and Song, Y.: A high-resolution emission inventory of crop burning in fields in China based on MODIS
- 15 Thermal Anomalies/Fire products, *Atmos. Environ.*, 50, 9–15, doi: 10.1016/j.atmosenv.2012.01.017, 2012.
- [7] Li, X., Wang, S., and Duan, L.: Carbonaceous Aerosol Emissions from Household Biofuel Combustion in China, *Environ. Sci. Technol.*, 43, 6076–6081, 2009.
- [8] Liousse, C., Penner, J. E., Chuang, C., Walton, J. J., Eddleman, H., and Cachier, H.: A global three-dimensional model study of carbonaceous aerosols, *J. Geophys. Res.*, doi: 10.1029/95jd03426, 1996.
- 20 [9] Lu, B., Kong, S., and Han, B.: Inventory of atmospheric pollutants discharged from biomass burning in China continent in 2007, *China Environmental Science*, 31, 186–194, 2011 (in Chinese).
- [10] Peng, L., Zhang, Q., and HE, K.: Emissions inventory of atmospheric pollutants from open burning of crop residues in China based on a National Questionnaire, *Res. Environ. Sci.*, 29, doi: 1109–1118, 2016 (in Chinese).
- [11] Qin, Y., and Xie, S. D.: Spatial and temporal variation of anthropogenic black carbon emissions in China for the period 1980–2009,
- 25 *Atmos. Chem. Phys.*, 12, 4825–4841, doi: 10.5194/acp-12-4825-2012, 2012.
- [12] Reddy, S. M. and Venkataraman, C.: Inventory of aerosol and sulphur dioxide emissions from India: Part II – biomass combustion, *Atmos. Environ.*, 36, 699–712, 2002.
- [13] Shen, G., Xue, M., Chen, Y., Yang, C., Li, W., Shen, H., Huang, Y., Zhang, Y., Chen, H., Zhu, Y., Wu, H., Ding, A., and Tao, S.: Comparison of carbonaceous particulate matter emission factors among different solid fuels burned in residential stoves, *Atmos. Environ.*,
- 30 89, 337–345, doi: 10.1016/j.atmosenv.2014.01.033, 2014.
- [14] Streets, D. G., Gupta, S., and Waldhoff, S. T.: Black carbon emissions in China, *Atmos. Environ. Res.*, 35, 4281–4296, 2001.
- [15] Streets, D. G., Yarber, K. F., Woo, J.-H., and Carmichael, G. R.: Biomass burning in Asia: Annual and seasonal estimates and atmospheric emissions, *Global Biogeochem. Cy.*, 17, 1099, doi:10.1029/2003GB002040, 2003.
- [16] Tang, X., Huang, C., and Lou, S.: Emission factor and PM chemical composition study of biomass burning in the Yangtze River
- 35 Delta Reigon, *Environmental Science*, 35, 1623–1632, 2014 (in Chinese).

- [17] Tian, H., Zhao, D., and Wang, Y.: Emission inventories of atmospheric pollutants discharged from biomass burning in China, *Acta. Sci. Circum.*, 31, 349–357, 2011 (in Chinese).
- [18] Wang, S., and Zhang, C.: Spatial and temporal distribution of air pollutant emissions from open burning of crop residues in China, *Sciencepaper Online*, 3, 329–333, 2008 (in Chinese).
- 5 [19] Wei, M., Wang, X., and Xie, G.: Maturity date of main field crop residues in different regions of China, *Journal of China Agricultural University*, 17, 20–31, 2012 (in Chinese).
- [20] Wei, W., Wang, S., Chatani, S., Klimont, Z., Cofala, J., and Hao, J.: Emission and speciation of non-methane volatile organic compounds from anthropogenic sources in China, *Atmos. Environ.*, 42, 4976–4988, 2008.
- [21] Zhang, H., Hu, J., Qi, Y., Li, C., Chen, J., Wang, X., He, J., Wang, S., Hao, J., Zhang, L., Zhang, L., Zhang, Y., Li, R., Wang, S., and  
10 Chai, F.: Emission characterization, environmental impact, and control measure of PM<sub>2.5</sub> emitted from agricultural crop residue burning in China, *Journal of Cleaner Production. Res.*, 149, 629–635, doi: 10.1016/j.jclepro.2017.02.092, 2017.
- [22] Zhang, H., Ye, X., Cheng, T., Chen, J., Yang, X., Wang, L., and Zhang, R.: A laboratory study of agricultural crop residue combustion in China: Emission factors and emission inventory, *Atmos. Environ.*, 42, 8432–8441, doi: 10.1016/j.atmosenv.2008.08.015, 2008.
- 15 [23] Zhang, J., Smith, K. R., Ma, Y., Ye, S., Jiang, F., Qi, W., Liu, P., Khalil, M. A. K., Rasmussen, R. A., and Thorneloe, S. A.: Greenhouse gases and other airborne pollutants from household stoves in China: a database for emission factors, *Atmos. Environ.*, 34, 4537–4549, 2000.
- [24] Zhang, N., Qin, Y., and Xie, S.: Spatial distribution of black carbon emissions in China, *Chinese Science Bulletin*, 58, 1855–1864, doi:10.1007/s11434-013-5820-4, 2013a (in Chinese).
- 20 [25] Zhang, Y., Shao, M., Lin, Y., Luan, S., Mao, N., Chen, W., and Wang, M.: Emission inventory of carbonaceous pollutants from biomass burning in the Pearl River Delta Region, China, *Atmos. Environ.*, 76, 189–199, doi: 10.1016/j.atmosenv.2012.05.055, 2013b.
- [26] Zhou, J., Wu, H., and Ding, S.: Analysis of seasonal variation in crop residue harvest and sustainability of its energy supply, *Resour. Sci.*, 33, 1537–1545, 2011 (in Chinese).
- [27] Zhu, J., Wang, T., Deng, J., Jiang, A., and Liu, D.: An emission inventory of air pollutants from crop residue burning in Yangtze  
25 River Delta Region and its application in simulation of a heavy haze weather process, *Acta Scientiae Circumstantiae*, 32, 3045–3055, 2012 (in Chinese).
- [28] Zhu, S. L.: Study on emission factors of GHG and pollutants from rural stoves in developing countries, *Renewable Energy*, 114, 16–19, 2004 (in Chinese).
